# 1 miRNA profiling of primate cervicovaginal lavage 2 and extracellular vesicles reveals miR-186-5p as a 3 potential retroviral restriction factor in macrophages

4 Zezhou Zhao<sup>1</sup>, Dillon C. Muth<sup>1</sup>, Kathleen Mulka<sup>1</sup>, Zhaohao Liao<sup>1</sup>, Bonita H. Powell<sup>1</sup>, Grace V.  
5 Hancock<sup>1,&</sup>, Kelly A. Metcalf Pate<sup>1</sup>, Kenneth W. Witwer<sup>1,2,\*</sup>

6 <sup>1</sup> Department of Molecular and Comparative Pathobiology, The Johns Hopkins University School of  
7 Medicine, 733 N. Broadway, Baltimore, MD 21218, USA; [zzhao23@jhu.edu](mailto:zzhao23@jhu.edu), [dillon.muth@gmail.com](mailto:dillon.muth@gmail.com),  
8 [kmulka1@jhmi.edu](mailto:kmulka1@jhmi.edu), [zliaol1@jhmi.edu](mailto:zliaol1@jhmi.edu), [bpowel15@jhu.edu](mailto:bpowel15@jhu.edu), [ghancock@ucla.edu](mailto:ghancock@ucla.edu), [kpate5@jhmi.edu](mailto:kpate5@jhmi.edu)

9 <sup>2</sup> Department of Neurology; The Johns Hopkins University School of Medicine, 733 N. Broadway, Baltimore,  
10 MD 21218, USA; [kwitwer1@jhmi.edu](mailto:kwitwer1@jhmi.edu)

11 <sup>&</sup> Currently at University of California, Los Angeles, Los Angeles, CA.

12 <sup>\*</sup> Correspondence: [kwitwer1@jhmi.edu](mailto:kwitwer1@jhmi.edu); Tel.: +1-(410)-955-9770

13

14 **Abstract:** The goal of this study was to characterize extracellular vesicles (EVs) and miRNAs of  
15 primate cervicovaginal lavage (CVL) during the menstrual cycle and simian immunodeficiency  
16 virus (SIV) infection, and to determine if differentially regulated CVL miRNAs might influence  
17 retrovirus replication. CVL and peripheral blood were collected from SIV-infected and uninfected  
18 macaques. EVs were enriched by stepped ultracentrifugation and characterized thoroughly. miRNA  
19 profiles were assessed with a medium-throughput stem-loop/hydrolysis probe qPCR platform and  
20 validated by single qPCR assays. Hormone cycling was abnormal in infected subjects, but EV  
21 concentration correlated with progesterone concentration in uninfected subjects. miRNAs were  
22 present predominantly in the EV-depleted CVL supernatant. Only a small number of CVL miRNAs  
23 were found to vary during the menstrual cycle or SIV infection. Among them was miR-186-5p,  
24 which was depleted in retroviral infection. In experiments with infected macrophages in vitro, this  
25 miRNA inhibited HIV replication. These results provide further evidence for the potential of EVs  
26 and small RNAs as biomarkers or effectors of disease processes in the reproductive tract.

27 **Keywords:** extracellular vesicle; exosome; microvesicle; microRNA; biomarker; HIV-1;  
28 cervicovaginal lavage; SIV; restriction factor

29

30

## 31 1. Introduction

32 The cervicovaginal canal is a potential source of biological markers for forensics investigations  
33 <sup>1-4</sup>, reproductive tract cancers <sup>5-7</sup>, and infections <sup>8-10</sup>. Cervicovaginal secretions may be collected by  
34 swab, tampon, or other methods, or secretion components may be liberated by a buffered wash  
35 solution and collected as cervicovaginal lavage (CVL). In addition to utility as biomarkers,  
36 constituents of cervicovaginal secretions, including proteins, certain microbes, and metabolites, exert  
37 function, for example by playing protective roles in wound healing <sup>11</sup> and against HIV-1 infection <sup>12-</sup>  
38 <sup>22</sup>. A large and important body of work has thus examined biomarker potential and functional roles  
39 of numerous entities in the cervicovaginal compartment.

40 Compared with secreted proteins, metabolites, and the microbiome, however, several  
41 components of cervicovaginal fluids are less well understood, including extracellular RNAs  
42 (exRNAs) and their carriers, such as extracellular vesicles (EVs) and ribonucleoprotein complexes  
43 (exRNPs). EVs are potential regulators of cell behavior in paracrine and endocrine fashion due to  
44 their reported abilities to transfer proteins, nucleic acids, sugars, and lipids between cells <sup>23</sup>. EVs  
45 comprise a wide array of double-leaflet membrane extracellular particles, including those of  
46 endosomal and cell-surface origin<sup>24,25</sup>, and range in diameter from 30 nm to well over one micron  
47 (large oncosomes) <sup>26</sup>. EV macromolecular composition tends to reflect, but is not necessarily identical  
48 to, that of the cell of origin <sup>27</sup>. EVs have been isolated from most cells, as well as biological fluids <sup>23,28</sup>,  
49 including cervicovaginal secretions of humans <sup>29</sup> and rhesus macaques <sup>30</sup>.

50 microRNAs (miRNAs) are one of the most studied classes of exRNA. These noncoding RNAs  
51 average 22 nucleotides in length and, in some cases, fine-tune the expression of target transcripts <sup>31,32</sup>.  
52 Released from cells by several routes, miRNAs are among the most frequently examined biomarker  
53 candidates in biofluids and, along with some other RNAs, are reported to be transmitted via EVs <sup>33-</sup>  
54 <sup>36</sup>. miRNAs are found not only in EVs, but also in free Argonaute-containing protein complexes; the  
55 latter may outnumber the former, at least in blood <sup>37,38</sup>. Many miRNAs are also highly conserved <sup>32</sup>,  
56 and abundant species typically have 100% identity in humans and nonhuman primates <sup>39</sup>. (For this  
57 reason, we will refer to hsa- (*Homo sapiens*) and mml- (*Macaca mulatta*) miRNAs without the species  
58 designation unless otherwise warranted by sequence disparity.) While miRNAs have been profiled  
59 in cervicovaginal secretions and menstrual blood, mostly in the forensics setting <sup>4,40,41</sup>, their  
60 associations with EV and exRNP fractions require further study. A recent publication reported that  
61 EVs from healthy vaginal secretions inhibited HIV-1 infection <sup>29</sup>. Another report found that CVL EVs  
62 (styled “exosomes”) were present at higher concentrations in cervical cancer, and that two miRNAs  
63 were also upregulated <sup>5</sup>. Our laboratory described a reduction of CVL EVs in a severe endometriosis  
64 case compared with reproductively healthy primates <sup>30</sup>. However, our study, along with others, was  
65 limited by the absence of molecular profiling of EV cargo <sup>30</sup>.

66 Here, we performed targeted miRNA profiling of EV-enriched and -depleted fractions of CVL  
67 and vaginal secretions collected from healthy and retrovirus-infected rhesus macaques. We queried  
68 how CVL EVs and miRNAs are affected by the menstrual cycle, an important potential confounder  
69 of biomarker studies <sup>42</sup>. Similarly, we assessed possible associations with simian immunodeficiency  
70 virus (SIV) infection. We report an association of miR-186 levels with SIV infection and find that this  
71 miRNA also appears to have antiretroviral effects in HIV-infected macrophages. These studies  
72 provide baseline information for easily accessed CVL markers including EVs and miRNAs that may  
73 become useful tools in the clinic.

74

## 75 2. Materials and Methods

### 76 Sample Collection

77 CVL and whole blood samples were collected weekly for five weeks from two uninfected  
78 (control) and four SIVmac251-infected (infected) rhesus macaques (*Macaca mulatta*) as previously  
79 described<sup>30</sup>. All macaques were negative for simian T-cell leukemia virus and simian type D  
80 retrovirus and were inoculated intravenously. Animals were sedated with ketamine at a dose of 7-10  
81 mg/kg prior to all procedures. CVL was performed by washing the cervicovaginal cavity with 3 mL  
82 of phosphate buffered saline (PBS, Thermo Fisher Scientific, Waltham, MA, USA. Cat #: 14190-144)  
83 directed into the cervicovaginal canal and re-aspirated using the same syringe. Materials and  
84 procedures for sample collection are depicted in Supplemental Figure 1. Volumes of CVL yield across  
85 collection dates were documented in Supplemental Table 1. Whole blood (3 mL) was collected by  
86 venipuncture into syringes containing acid citrate dextrose solution (ACD) (Sigma Aldrich, St. Louis,  
87 MO, USA. Cat #: C3821).

88

### 89 Study Approvals

90 All animal studies were approved by the Johns Hopkins University Institutional Animal Care  
91 and Use Committee (IACUC) and conducted in accordance with the Weatherall Report, the Guide  
92 for the Care and Use of Laboratory Animals, and the USDA Animal Welfare Act.

93

### 94 Sample Processing

95 Sample processing began within a maximum of 60 minutes of collection and utilized serial  
96 centrifugation steps to enrich EVs as described previously<sup>30</sup>, based on a standard EV isolation  
97 protocol<sup>43</sup>. Specifically, fluids were centrifuged: (1) 1,000 × g for 15mins at 4°C in a tabletop centrifuge;  
98 (2) 10,000 × g for 20 mins at 4°C; and (3) 110,000 × g for 2 hours at 4°C with a Sorvall Discovery SE  
99 ultracentrifuge (Thermo Fisher Scientific) with an AH-650 rotor (k factor: 53.0) (Supplemental Figure  
100 1B). Following each centrifugation step, most supernatant was removed, taking care not to disturb  
101 the pellet. After each step, supernatant was set aside for nanoparticle tracking analysis (NTA; 200  
102 μL), and RNA isolation (200 μL) following the second and third steps. The pellet was resuspended  
103 in 400 μL of PBS after each centrifugation step. After the final step, the remaining ultracentrifuged  
104 supernatant was concentrated to approximately 220 μL using Amicon Ultra-2 10 kDa molecular  
105 weight cutoff filters (Merck KGaA, Darmstadt, Germany. Cat #: UFC201024). 200 μL of the  
106 concentrate was used for RNA isolation and the remainder was retained for NTA. All samples  
107 reserved for RNA isolation were mixed with 62.6 μL of RNA isolation buffer (Exiqon, Vedbaek,  
108 Denmark. Cat #: 300112. Lot #: 593-84-9n) containing three micrograms of glycogen and 5 pg of  
109 synthetic cel-miR-39 as previously described<sup>44</sup>. Processed samples were analyzed immediately or  
110 frozen at -80°C until further use.

111 For plasma, whole blood was centrifuged at 800 × g for 10 mins at 25°C. Supernatant was  
112 centrifuged twice at 2,500 × g for 10 mins at 25°C. The resulting platelet-poor plasma was aliquoted  
113 and frozen at -80°C.

114

### 115 Hormone Analysis

116 Levels of progesterone (P4) and estradiol-17b (E2) were measured in plasma samples shipped  
117 overnight on dry ice to the Endocrine Technology and Support Core Lab at the Oregon National  
118 Primate Research Center, Oregon Health and Science University.

119

### 120 Nanoparticle Tracking Analysis

121 Extracellular particle concentration was determined using a NanoSight NS500 NTA system  
122 (Malvern, Worcestershire, UK). Cervicovaginal lavage samples were diluted as needed and specified  
123 in Supplemental Table 2 to ensure optimal NTA analysis. At least five 20-second videos were  
124 recorded for each sample at a camera setting of 12. Data were analyzed at a detection threshold of  
125 two using NanoSight software version 3.0.

126

127 **Western Blot**

128 Western blot was used to detect the presence of EV protein markers and the absence of  
129 nucleoporin (nuclear marker) in CVL and enriched CVL EVs. 20  $\mu$ L of samples from each fraction  
130 were lysed with 5  $\mu$ L 1:1 mixture of RIPA buffer (Cell Signaling Technology, Danvers, MA. Cat #: 9806S)  
131 and protease inhibitor (Santa Cruz Biotechnology, Dallas, TX. Cat #: sc29131). 8  $\mu$ L of Laemmli  
132 4X sample buffer (BioRad, Hercules, CA. Cat #:161-0747 Lot #: 64077737) was added per sample, and  
133 30  $\mu$ L of each was loaded into a Criterion TGX 4-15% gel (BioRad, Hercules, CA. Cat #: 5678084 Lot  
134 #: 64301319) after 5 mins of 95 °C incubation. The gel was electrophoresed by application of 100V for  
135 100 mins. The proteins were then transferred to a PVDF membrane (BioRad, Hercules, CA. Cat #: 1620177,  
136 Lot #:31689A12.), which was blocked with 5% milk (BioRad, Hercules, CA. Cat #: 1706404.  
137 Lot #: 64047053) in PBS+0.1%Tween®20 (Sigma-Aldrich, St. Louis, MO Cat #: 274348 Lot #:  
138 MKBF5463V) for 1 hour. The membrane was subsequently incubated with mouse anti-human CD63  
139 (BD Biosciences, San Jose, CA Cat #: 556019 Lot #: 6355939) and mouse monoclonal IgG\_2b CD81  
140 (Santa Cruz Biotechnology, Dallas, TX Cat #: 166029 Lot #: L1015) primary antibodies, at a  
141 concentration of 0.5  $\mu$ g/mL overnight. After washing the membrane, it was incubated with a goat  
142 anti-mouse IgG-HRP secondary antibody (Santa Cruz Biotechnology, Dallas, TX Cat #: sc-2005 Lot #:  
143 B1616) at a 1:5,000 dilution for 1 h. The membrane was then incubated with a 1:1 mixture of  
144 SuperSignal West Pico Stable Peroxide solution and Luminol Enhancer solution (Thermo Scientific,  
145 Rockford, IL Cat #: 34080 Lot #: SD246944) for 5 min. The membrane was visualized on Azure 600  
146 imaging system (Azure Biosystems, Dublin, CA). The second blot was done in a reducing  
147 environment using 10mM DTT (Promega, Madison, WI Cat #: P1171 Lot #: 0000198991). Same  
148 procedures were followed with rabbit anti-human TSG101 (Cat #: ab125011 Lot #:GR180132-14),  
149 rabbit polyclonal anti-nucleoporin (Abcam, Cambridge, MA Cat #: ab96134 Lot #: GR22167-18)  
150 primary antibodies. Subsequent incubation with goat anti-rabbit IgG-HRP secondary antibody  
151 (Abcam, Cambridge, MA Cat #: sc-2204 Lot #: B2216). All antibodies were used at the same  
152 concentration as the first blot. Membrane was visualized on the Azure imaging system.

153

154 **Single particle interferometric reflectance imaging**

155 Both CVL-derived and dendritic cell LK23-derived EVs were diluted 1:1000 and incubated on  
156 ExoView (NanoView Biosciences, Brighton, MA) chips that were printed with anti-CD63 (BD  
157 Biosciences, Bedford, MA. Cat#: 556019) and anti-CD81 (BD Biosciences, Bedford, MA. Cat #: 555675)  
158 antibodies. After incubation for 16 hours, chips were washed per manufacturer's protocol and  
159 imaged in the ExoView scanner by interferometric reflectance imaging.

160

161 **Electron Microscopy**

162 Gold grids were floated on 2% paraformaldehyde-fixed CVL-derived samples for two minutes,  
163 then negatively stained with uranyl acetate for 22 seconds. Grids were observed with a Hitachi 7600  
164 transmission electron microscope in the Johns Hopkins Institute for Basic Biomedical Sciences  
165 Microscope Facility.

166

167 **Total RNA Isolation and Quality Control**

168 RNA isolation work flow is shown in Supplemental Figure 1C. RNA lysis buffer was added into  
169 each sample as described above prior to freezing (-80 °C). Total RNA was isolated from thawed  
170 samples using the miRCURY RNA Isolation Kit-Biofluids (Exiqon, Vedbaek, Denmark. Cat #: 300112.  
171 Lot #: 593-84-9n) per manufacturer's protocol with minor modifications as previously described<sup>44</sup>.  
172 Total RNA was eluted with 50  $\mu$ L RNase-free water and stored at -80°C. As quality control,  
173 expression levels of several small RNAs including snRNA U6, miR-16-5p, miR-223-3p, and the  
174 spiked-in synthetic cel-miR-39 were assessed by TaqMan miRNA assays (Applied Biosystems/ Life  
175 Technologies, Carlsbad, California, USA) <sup>45</sup>.

176

177 **miRNA Profiling by TaqMan Low-Density Array**



178 A custom 48-feature TaqMan low-density array (TLDA) was ordered from Thermo Fisher, with  
179 features chosen based on results of a human CVL pilot study (GVH and KWW, unpublished data).  
180 Stem-loop primer reverse transcription and pre-amplification steps were conducted using the  
181 manufacturer's reagents as previously described <sup>46</sup> but with 14 cycles of pre-amplification. Real time  
182 quantitative PCR was performed with a QuantStudio 12K instrument (Johns Hopkins University  
183 DNA Analysis Facility). Data were collected using SDS software and Cq values extracted with  
184 Expression Suite v1.0.4 (Thermo Fisher Scientific, Waltham, MA USA). Raw Cq values were adjusted  
185 by a factor determined from the geometric mean of 10 relatively invariant miRNAs. The selection  
186 process for these invariant miRNAs was to 1) rank miRNAs by coefficient of variation; 2) remove  
187 miRNAs with high average Cq (>30), non-miRNAs, and those with low amplification score; 3) select  
188 the lowest-CV member of miRNA families (e.g., the 17/92 clusters); and 4) pick the top 10 remaining  
189 candidates by CV: let-7b-5p, -miR-21-5p, -27a-3p, -28-3p, -29a-3p, -30b-5p, -92a-3p, -197-3p, -200c-3p,  
190 and -320a-3p.

191

### 192 **Individual RT-qPCR Assays**

193 Individual TaqMan miRNA qPCR assays were performed as previously described <sup>46</sup> on all UC  
194 pellet samples from all animals across all weeks for miRs-19a-3p (Thermo Fisher Assay ID #000395),  
195 -186-5p (Thermo Fisher Assay ID #002285), -451a-5p (Thermo Fisher Assay ID #001105), -200c-3p  
196 (Thermo Fisher Assay ID #002300), -222-3p (Thermo Fisher Assay ID #002276), -193b-3p (Thermo  
197 Fisher Assay ID #002367), -181a-5p (Thermo Fisher Assay ID #000480), -223a-3p (Thermo Fisher Assay  
198 ID #002295), -16-5p (Thermo Fisher Assay ID #000391), -106a-5p (Thermo Fisher Assay ID #002169),  
199 and -125b-5p (Thermo Fisher Assay ID #00449). We also measured miR-375-3p (Thermo Fisher Assay  
200 ID #00564), which was not included on the array. Data were adjusted to Cqs of miR-16-5p.

201

### 202 **Blood Cell Isolation and Monocyte-Derived Macrophage Culture**

203 Total PBMCs were obtained from freshly drawn blood from human donors under a Johns  
204 Hopkins University School of Medicine IRB-approved protocol (JHU IRB #CR00011400). Blood was  
205 mixed with 10% Acid Citrate Dextrose (ACD) (Sigma Aldrich, St. Louis, MO Cat #: C3821 Lot #:  
206 SLBQ6570V) with gentle mixing by inversion. Within 15 minutes of draw, blood was diluted with  
207 equal volume of PBS+ 2% FBS, gently layered onto room temperature Ficoll (Biosciences AB, Uppsala,  
208 Sweden Cat #:17-1440-03 Lot #: 10253776) in Sepmate-50 tubes (STEMCELL Technologies, Vancouver,  
209 BC, Canada Cat #: 15450 Lot #: 06102016) and centrifuged for 10 minutes at 1200 × g. Plasma and  
210 PBMC fractions were removed, washed in PBS+ 2% FBS, and pelleted at 300 × g for 8 minutes. Pellets  
211 from 5 tubes were combined by resuspension in 10 mL RBC lysis buffer (4.15 g NH<sub>4</sub>Cl, 0.5 g KHCO<sub>3</sub>,  
212 0.15 g EDTA in 450 mL H<sub>2</sub>O; pH adjusted to 7.2–7.3; volume adjusted to 500 mL and filter-sterilized);  
213 total volume was brought to 40 mL with RBC lysis buffer. After incubation at 37 °C for 5 mins, the  
214 suspension was centrifuged at 400 × g for 6 mins at room temperature. The cell pellet was  
215 resuspended in Macrophage Differentiation Medium with 20% FBS (MDM20) to a final concentration  
216 of 2×10<sup>6</sup> cells/mL. PBMCs were plated at 4×10<sup>6</sup> cells per well in 12-well plates and cultured in  
217 MDM20 for 7 days. One half of the total volume of medium was replaced on day 3. On day 7, cells  
218 were washed 3 times with PBS to remove non-adherent cells. The medium was replaced with  
219 Macrophage Differentiation Medium with 10% serum (MDM10) and cultured overnight prior to  
220 transfection.

221

### 222 **miRNA Mimic Transfection**

223 Differentiated macrophages were transfected with 50 nM miRNA-186-5p (Qiagen, Foster City,  
224 CA. Cat #: MSY0000456 Lot #: 286688176) using Lipofectamine 2000 (Invitrogen/Life Technologies,  
225 Carlsbad, CA Cat #: 11668-019 Lot #:1467572) diluted in OptiMEM Reduced Serum Medium (Gibco,  
226 Grand Island, NY Cat #: 31985-070 Lot #: 1762285). Controls included mock transfections and  
227 transfection of 50 nM double-stranded siRNA oligo labeled with Alexa Fluor 555 (Invitrogen,  
228 Fredrick, MD Cat #: 14750-100 Lot #: 1863892). Plates were incubated for 6 hours at 37 °C. After  
229 incubation, successful transfection was confirmed by examining uptake of labeled siRNA with an

230 Eclipse TE200 inverted microscope (Nikon Instruments, Melville, NY). Transfection medium was  
231 removed. The plates were washed with PBS and refed with 2 mL fresh MDM10 medium.

232

### 233 **HIV Infection**

234 HIV-1 BaL stocks were generated from infected PM1 T-lymphocytic cells and stored at  $-80^{\circ}\text{C}$ .  
235 24 hours after mimic or mock transfections, macrophages were infected with HIV BaL and incubated  
236 overnight (stock,  $80\ \mu\text{g p24/mL}$ , diluted to  $200\ \text{ng p24/mL}$ ). At days 3, 6, and 9 post-infection,  $500\ \mu\text{L}$   
237 supernatant was collected for p24 release assays and cells were lysed with  $600\ \mu\text{L}$  mirVana lysis buffer  
238 for subsequent RNA isolation and analysis.

239

### 240 **HIV p24 Antigen ELISA**

241 Supernatant samples were lysed with Triton-X (Perkin Elmer, Waltham, MA Cat #:   
242 NEK050B001KT Lot #: 990-17041) at a final concentration of 1%. The DuPont HIV-1 p24 Core Profile  
243 ELISA kit (Perkin Elmer, Waltham, MA Cat #: NEK050B001KT Lot #: 990-17041) was used per  
244 manufacturer's instructions to measure p24 concentration based on the provided standard.

245

### 246 **Total RNA Isolation**

247 Total RNA was isolated using the mirVana miRNA Isolation Kit per manufacturer's protocol  
248 (Ambion, Vilnius, Lithuania. Cat #: AM1560 Lot #: 1211082). Note that this procedure yields total  
249 RNA, not just small RNAs. After elution with  $100\ \mu\text{L}$  RNase-free water, nucleic acid concentration  
250 was measured using a NanoDrop 1000 spectrophotometer (Thermo Fisher Scientific, Wilmington,  
251 DE). RNA isolates were stored at  $-80^{\circ}\text{C}$ .

252

### 253 **HIV Gag RNA RT-qPCR**

254 Real-time one-step reverse transcription quantitative PCR was performed with the QuantiTect  
255 Virus Kit (Qiagen, Foster City, CA Cat #:211011 Lot #: 154030803). Each  $25\ \mu\text{L}$  reaction mixture  
256 contained  $15\ \mu\text{L}$  of master mix containing HIV-1 RNA standard,  $100\ \mu\text{M}$  of FAM dye and IBFQ  
257 quencher labeled Gag probe ( $5'\ \text{ATT ATC AGA AGG AGC CAC CCC ACA AGA } 3'$ ),  $600\ \text{nM}$  each of  
258 Gag1 forward primer ( $5'\ \text{TCA GCC CAG AAG TAA TAC CCA TGT } 3'$ ) and Gag2 reverse primer ( $5'$   
259  $\text{CAC TGT GTT TAG CAT GGT GTT T } 3'$ ), nuclease-free water, and QuantiTect Virus RT mix, and  $10$   
260  $\mu\text{L}$  serial-diluted standard or template RNA. No-template control and no reverse transcriptase  
261 controls were included. Linear standard curve was generated by plotting the log copy number versus  
262 the quantification cycle (Cq) value. Log-transformed Gag copy number was calculated based on the  
263 standard curve.

264

### 265 **Data analysis**

266 Data processing and analysis were conducted using tools from Microsoft Excel (geometric mean  
267 normalization), Apple Numbers, GraphPad Prism, the MultiExperiment Viewer, and  
268 R/BioConductor packages including pheatmap (<http://CRAN.R-project.org/package=pheatmap>;  
269 quantile normalization, Euclidean distance, self-organizing maps, self-organizing tree algorithms, k-  
270 means clustering). Figures and tables were prepared using R Studio, Microsoft Excel and Word,  
271 Apple Numbers and Keynote, GraphPad Prism, and Adobe Photoshop.

272

### 273 **Data Availability and Rigor and Reproducibility**

274 Array data have been deposited with the Gene Expression Omnibus (GEO) <sup>47</sup> as GSE107856.  
275 Data in other formats are available upon request. To the extent that sample quantities would allow,  
276 the MISEV recommendations for EV studies were followed<sup>24</sup>, and the EV experiments have been  
277 registered with the EV-TRACK knowledgebase, <sup>48</sup> with preliminary EV-TRACK code XL5296IL.

278

## 279 3. Results

### 280 3.1. Abnormal menstrual cycle of SIV-infected macaques and ovulation-associated changes in CVL EV- 281 enriched particles

282 Plasma and CVL were collected from two control and four SIV-infected macaques over the  
283 course of five weeks (Supplemental Figure 1). Abnormal cycling was observed for infected subjects  
284 (K. Mulka, et al, unpublished data). By nanoparticle tracking analysis, CVL EV concentration in  
285 control animals increased during ovulation (Figure 1A). Transmission electron microscopy was  
286 performed for representative fractions of CVL, revealing bacteria and large particles in the 10,000 × g  
287 pellet (Figure 1B). The 100,000 × g pellet included apparent EVs up to 200 nm in diameter (Figure 1C).  
288 EV markers (shown: CD63, CD81, and TSG101) were confirmed by Western blot (Figure 1D). The  
289 nuclear marker nucleoporin was detected only in tissue samples (Figure 1D). The relative EV  
290 tetraspanin profiles of both CVL and control EV samples were corroborated with single particle  
291 interferometric reflectance imaging: CVL EVs had a higher CD63 expression and dendritic cell EVs  
292 had higher CD81 expression.

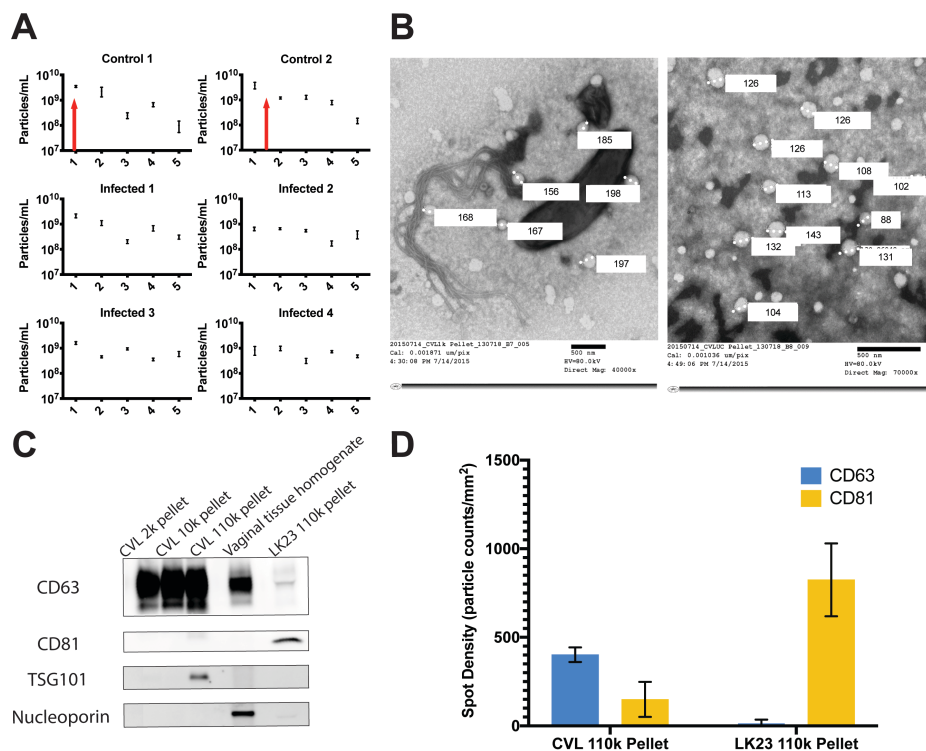

293  
294 **Figure 1.** EV composition during the menstrual cycle. **A)** Nanoparticle concentrations of CVL  
295 ultracentrifuge (UC) pellets monitored weekly over five weeks for two SIV-negative ("control") and  
296 four SIV-infected rhesus macaques. Red arrows indicate time of ovulation for 2 control animals, which  
297 were absent for SIV infected animals. **B)** Transmission electron micrographs of CVL pellets from the  
298 10,000× g pellet (left) and 110,000× g pellet (right) confirm presence of bacteria and EVs/EV-like  
299 particles, with several respective diameters indicated. **C)** Western blot analysis suggests enrichment  
300 of EV markers CD63, CD81, and TSG101 in 110k pellet fraction of CVL from uninfected animals.  
301 Vaginal tissue homogenate and dendritic cell (DC, LK23) 110k pellet controls were also positive for  
302 CD63 and CD81. Nuclear marker nucleoporin was detected in tissue homogenate but not in putative  
303 EV samples. **D)** SP-IRIS confirmation of EV markers on CVL and DC EVs. Shown are averages of  
304 tetraspanin-positive particles bound to anti-CD63 and anti-CD81 antibodies and detected by label-  
305 free imaging.

### 306 3.2. TLDA reveals an extracellular miRNA profile of the cervicovaginal compartment

307 Based upon preliminary findings from a study of human CVL (Hancock and Witwer,  
308 unpublished data), we designed a custom TaqMan low-density array (TLDA) to measure 47 miRNAs  
309 expected to be present in CVL, along with the snRNA U6. CVL from all subjects and at all time points  
310 was fractionated by stepped centrifugation to yield a 10,000 x g pellet (10K pellet), a 100,000 x g pellet  
311 (UC pellet), and 100,000 x g supernatant (UC supernatant). Total RNA from all fractions was profiled  
312 by TLDA. Raw (Supplemental Figure S2A), quantile normalized (Supplemental Figure S2B), and  
313 geometric mean-adjusted Cq values (Supplemental Figure S2C) were subjected to unsupervised  
314 hierarchical clustering. This clustering did not reveal broad miRNA profile differences associated  
315 with sample collection time, menstruation, or SIV infection.

### 316 3.3. Distribution of miRNAs across CVL fractions

317 Across the three examined CVL fractions (p10, p100, S100), the ten most abundant miRNAs  
318 (lowest Cq values) were miRs-223-3p, -203a-3p, -24-3p, -150-5p, -21-5p, -146a-5p, -92a-3p, -222-3p, -  
319 17-5p, and -106a-5p. The average normalized Cq value for each miRNA was greater (i.e., lower  
320 abundance) in the p100 than the s100 fraction (Figure 2A and inset), and indeed in p10 and p100  
321 combined (Figure 3B), suggesting that most miRNA in CVL, as reported for various other body fluids,  
322 is found outside the EV-enriched fractions. Considering all fractions, the differences between the EV-  
323 enriched and EV-depleted fractions were significant even after Bonferroni correction for all features  
324 except U6. On average, the s100 fraction contained 86.5% of the total miRNA from these three  
325 fractions. In the p10 fraction, the average miRNA was detected at 10.5% its level in the s100 fraction  
326 (SD=5.7%). miR-34a-5p had the lowest (5.9%) and miR-28-3p the highest (33.7%) abundance  
327 compared with s100. In the p100 fraction, miRNAs were on average 5.6% (SD=2.4%) as abundant as  
328 in s100. The least represented in p100 was miR-27a-3p (2.3%), and the best represented was again  
329 miR-28-3p (13.4%). Together, the content of the EV-enriched fractions (p10 and p100) as a percentage  
330 of the total is shown in Figure 2B for individual miRNAs. miRNA rank was significantly correlated  
331 across fractions, despite minor differences in order (Figure 2C).



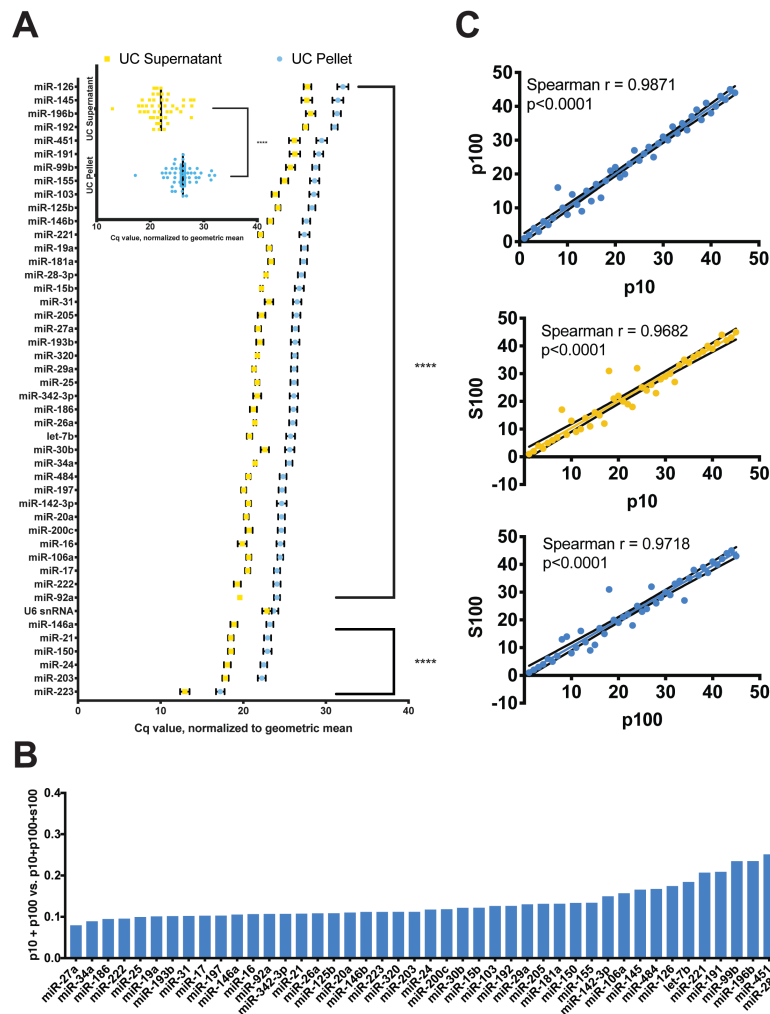

332

333

334

335

336

337

338

339

**Figure 2.** Relative abundance of miRNAs in different CVL fractions. **A)** Abundant miRNAs in descending order based on Cq values normalized to the geometric mean for each sample. Inset: average of all miRNAs in UC pellet and UC supernatant. Error bars: SEM. **B)** miRNA expression in EV-enriched fractions (p10, p100) as a percentage of total estimated expression (p10+p100+S100 by Cq) in ascending order, from miR-27a-3p (7.9%) to miR-28-3p (32.0%). **C)** miRNAs in each fraction (10,000× g pellet=p10, 110,000 × g pellet=p100, 110,000× g supernatant=S100, and) are significantly correlated ( $p < 0.0001$ , Spearman).

340

#### 3.4. qPCR Validation

341

342

343

344

345

346

347

348

349

350

351

352

Individual stem loop RT/hydrolysis probe qPCR assays were used to verify TLDA results for eleven selected miRNAs plus miR-375-3p (not included on the array), which was also measured because of a reported association with goblet cells<sup>49</sup>. Some miRNAs were chosen due to high expression levels. miR-181a-5p was measured due to its association with endometrial cells<sup>50,51</sup>. miR-125b-5p has been reported as a diagnostic marker of endometriosis<sup>52</sup>. Other miRNAs (miRs-186-5p, -451a-5p, -200c-3p, -222-3p, -193b-3p) were selected based on our previous experience and results from other studies evaluating miRNAs in the context of HIV-1 and SIV infections. Results of qPCR assays, adjusted by miR-16-5p for each sample (since we found relatively low qPCR variation of miR-16-5p, a commonly used normalizer<sup>53</sup>), are shown in Figure 3A. Figure 3B compares miRNA ranks (1-11) by TLDA and individual qPCR, which are generally in concordance. Note that expression of red blood cell miRNA miR-451a-5p was low, suggesting minimal contamination from blood for most samples.

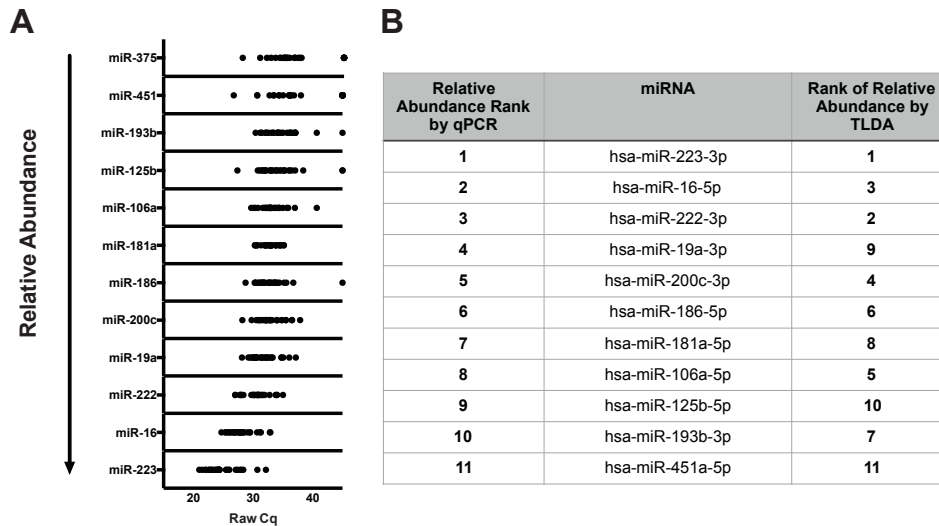

353

354

355

**Figure 3.** miRNA qPCR validation. **A)** qPCR validation for UC pellet samples, all subjects and time points (individual dots). **B)** Ranks of abundant miRNAs by qPCR and TLDA.

356

### 3.5. miRNA association with retroviral infection status

357

358

359

360

361

362

363

An association of miRNA abundance with infection status could yield novel biomarkers as well as clues to roles of miRNA in modulating infection. However, the small number of subjects in our study was a challenge. Nevertheless, by considering all subjects and time points together for both infected and uninfected subjects, microarray data suggested a slightly reduced abundance of miRs-186-5p, -222-3p, and -200c-3p in infected samples (Figure 4A) based on statistical analysis of  $\Delta Cq$  values, while qPCR revealed differential abundance of miRs-186-5p and -125b-5p (Figure 4B). miR-186-5p was thus identified by both techniques as potentially associated with retroviral infection.

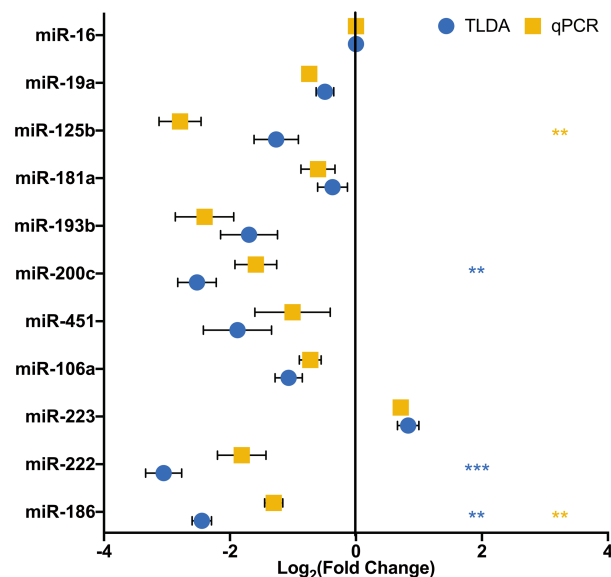

364

365

366

367

368

369

370

371

**Figure 4.** miR-186-5p downregulation: SIV. miR-186-5p fold change was determined using  $\Delta\Delta Cq$  method using miR-16 and uninfected animals as controls.  $\log_2(\text{fold change})$  for both TLDA and qPCR analyses was plotted for 11 selected validation miRNAs. Statistical analyses were performed on  $\Delta Cq$  values. For TLDA, miRs-186, -222, and -200c were significantly less abundant in the CVL p100 fraction of infected subjects (Mean  $\pm$  SEM, Multiple t test, Bonferroni-Dunn Correction), \*\*  $p < 0.01$ , \*\*\*  $p < 0.001$ . For qPCR analysis, miRs-186 and -125b were significantly less abundant (Multiple t test, Bonferroni-Dunn Correction), \*\*  $p < 0.01$ , \*\*\*  $p < 0.001$

372 3.6. miR-186-5p transfection has minimal effects on cellular HIV RNA abundance but reduces p24 release  
373 from monocyte-derived macrophages

374 To assess a possible influence of miR-186-5p (“miR-186”) on retroviral replication, we  
375 introduced double-stranded miR-186-5p mimic or control RNA into monocyte-derived macrophages  
376 derived from three donors 24 hours before infecting the cells or not with HIV. At days three and six  
377 post-infection, we quantitated full-length HIV-1 transcript using a gag qPCR with standard curve. In  
378 cells from only one of three donors were fewer HIV-1 copies associated with miR-186-5p mimic  
379 transfection (Figure 5). Overall, there was no statistically significant difference in HIV RNA between  
380 the conditions.

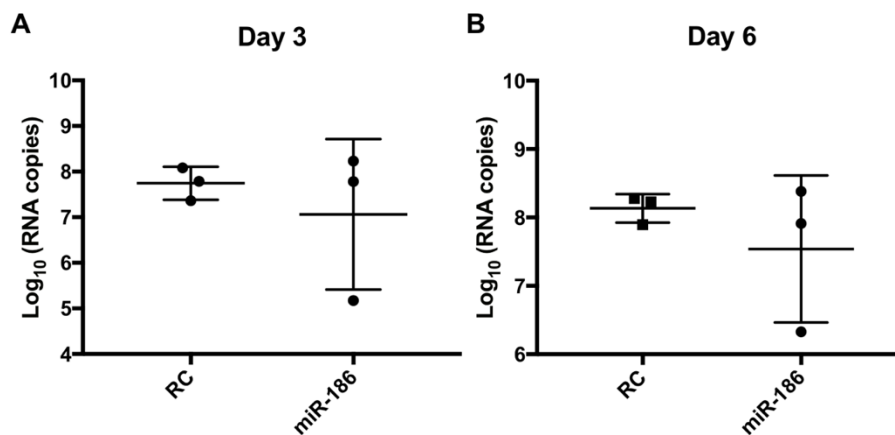

381

382 **Figure 5.** miRNA-186-5p mimic transfection inconsistently suppresses HIV-1 gag mRNA production.  
383 Apparent downregulation of gag mRNA (qPCR assay with standard curve) was observed in miR-  
384 186-transfected monocyte-derived macrophages from only 1 of 3 donors compared with control RNA-  
385 transfected cells (RC). Overall, results were insignificant by t-test,  $p > 0.1$ , with multiple replicates of  
386 cells from 3 human donors.

387 However, at the same time points and also out to nine days post-infection, a different result was  
388 seen for capsid p24 release into the supernatant. For infected but untransfected cells, measurable p24  
389 was observed by 3 dpi, and p24 counts increased by two-fold or more by 9 dpi (Figure 6A) for  
390 multiple replicate experiments with cells from three donors. Compared with infected, untreated  
391 controls, mock-transfected cells (not shown), and cells transfected with a negative control RNA  
392 (labeled with a fluorophore to assess transfection efficiency), miR-186-5p transfection was associated  
393 with a significant decline of released p24 at all time points (ANOVA with Bonferroni correction)  
394 (Figure 6B-D). The negative control condition showed a suppressive trend that reached nominal  
395 significance at 9 dpi. However, miR-186-associated suppression was significantly greater at all time  
396 points.

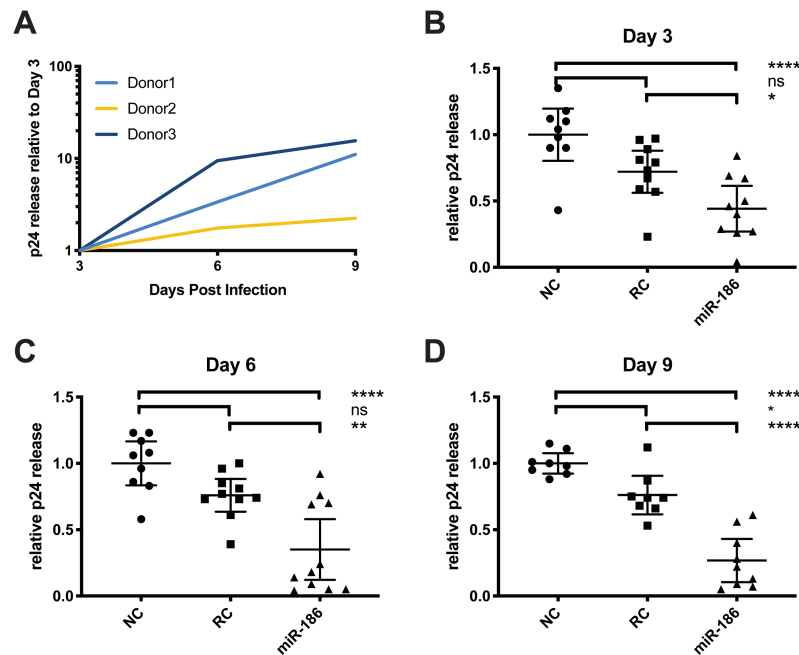

397

398

399

400

401

402

403

404

**Figure 6.** miRNA-186-5p inhibits p24 release. Monocyte-derived macrophages from human donors were infected with HIV-1 BaL. **A)** p24 production increased >2 fold for all donors from 3 to 9 days post-infection (dpi), untreated cells. **B-D)** Transfection of miR-186-5p mimic was associated with a decrease of p24 release compared with untransfected controls (NC) and control RNA mimic-transfected controls (RC) at the indicated time points; ns=not significant, \* p<0.05, \*\* p<0.01, \*\*\*\* p<0.0001 (ANOVA followed by Bonferroni correction for multiple tests). Results were from 8 to 11 replicate experiments with cells from 3 human donors.

405

### 3.7 p24 inhibition by miR-186-5p is correlated with transfection efficiency

406

407

408

409

410

411

Despite the statistical significance of miR-186-5p-associated p24 inhibition, substantial variability was observed, including between donors/experiments; we therefore hypothesized that either donor- or experiment-specific factors were responsible for the variability. The transfection experiments were repeated using macrophages from five additional donors (labeled 1-5). While significant but variable inhibition of p24 release after miR-186-5p transfection was observed for three donors (1, 2, and 5), little or no inhibition was seen for donors 3 and 4 (Figure 7).

412

413

414

415

416

417

418

419

420

421

One experimental variable that could affect the degree of inhibition is the efficiency with which the miRNA mimic is delivered into the cells. Since this variable was not assessed in our previous experiments, we measured it for the five new experiments. Despite using the same nominal concentrations of miRNA mimics for our experiments, a nearly 100-fold range of miR-186-5p concentration was observed between the lowest- and highest-efficiency transfections (Figure 9A), which increased miR-186-5p levels from around 5-fold to nearly 500-fold, respectively. Strikingly, the miR-186-5p level was inversely correlated with released p24 across these five donors. It should be noted that miR-186-5p antisense inhibitors were also introduced in these experiments. While they did not significantly increase HIV p24 release (Figure 7), they also did not achieve a consistent knockdown of native miR-186-5p (Figure 8A).



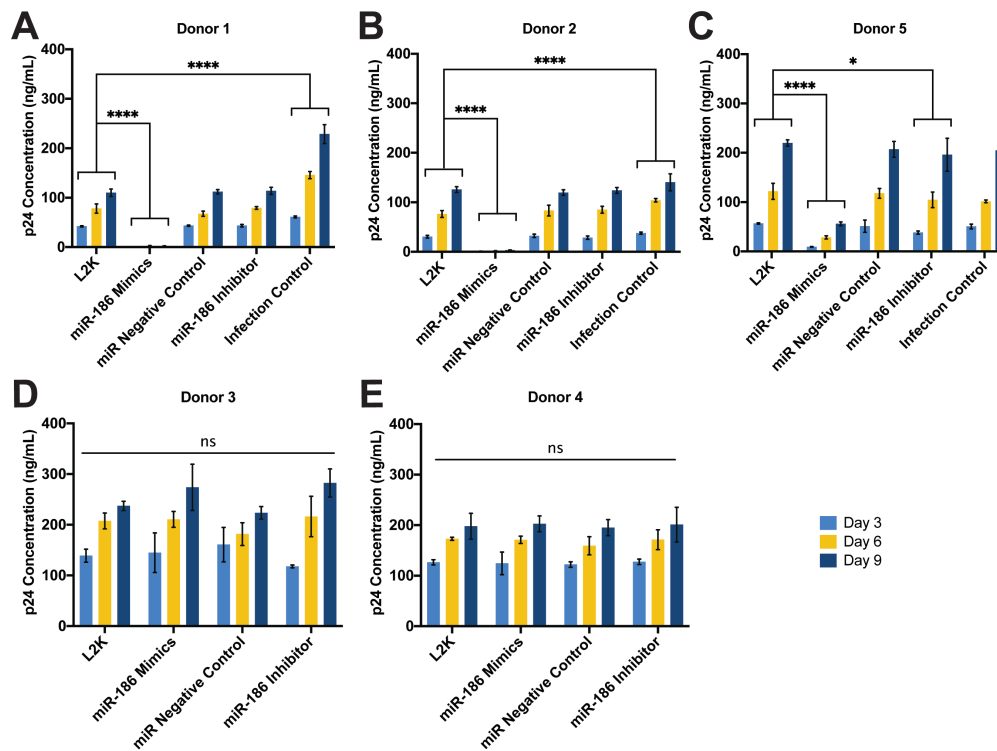

422

423

424

425

426

427

428

429

**Figure 7.** miRNA-186-5p inhibits p24 release in a donor-specific manner. Monocyte-derived macrophages from human donors were infected with HIV-1 BaL. **A-C)** Compared with mock transfected controls, transfection of miR-186 mimic was associated with a significant decrease of p24 production from 3 to 9 days post-infection (dpi) in donors 1, 2, and 5. **D-E)** For donors 3 and 4, transfection of miR-186 mimic was ineffective in inhibiting p24 release compared with mock transfected controls; ns=not significant, \* p<0.05, \*\* p<0.01, \*\*\*\* p<0.0001 (Two-way ANOVA followed by Bonferroni correction for multiple tests).

430

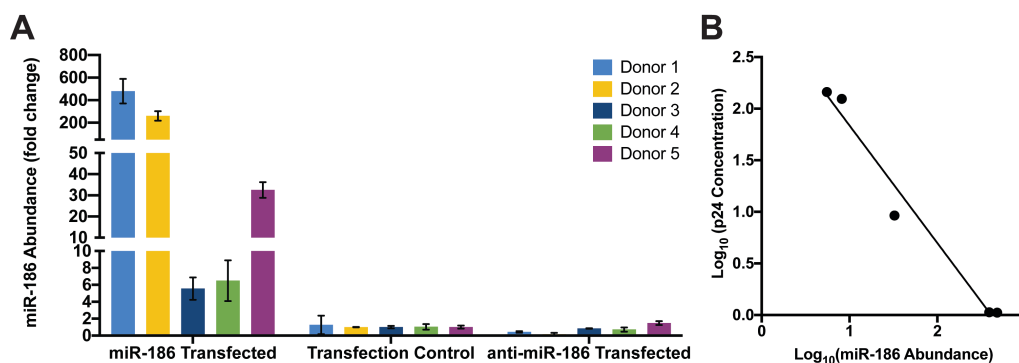

431

432

433

434

435

436

**Figure 8.** miR-186-5p abundance post-transfection and correlation with p24 release. **A)** Abundance of miR-186-5p in macrophages post-transfection, as assessed by qPCR and compared (fold change) with the average of control macrophages. **B)** Correlation of macrophage miR-186-5p and p24 concentration released in supernatant three days post-infection. p(two-tailed)=0.0019 (Correlation),  $R^2 = 0.9731$ (Linear regression).

437

438

#### 439 4. Discussion

440 Cervicovaginal lavage EVs and exRNPs, like EVs in the uterus<sup>54,55</sup>, may offer information about  
441 the health of the reproductive tract and may also facilitate or block transmission of infectious agents.  
442 Proteomic analyses of human<sup>56</sup> and rhesus macaque<sup>57</sup> CVL have suggested a core proteome and a  
443 highly variable proteome that responds to changes in pregnancy status, menstruation, infection, and  
444 other stressors. However, exRNA and extracellular vesicle profiles are less understood in this  
445 compartment. Thus, one major finding of this study is a partial profile of miRNAs of EV-enriched  
446 and -depleted fractions of CVL fluid of primates. We report that EVs can be liberated from vaginal  
447 secretions by lavage, and that these EVs can be concentrated using a standard stepped centrifugation  
448 procedure, with enrichment of positive (membrane-associated) markers while a cellular negative  
449 control was not detected.

450 Both EV-replete and EV-depleted fractions of CVL contained abundant miRNA. As reported for  
451 other biological fluids<sup>37,58</sup>, miRNA concentration was highest in the EV-depleted CVL fractions, not  
452 in EV-enriched ultracentrifuged pellets, consistent with packaging of most extracellular miRNA into  
453 exRNPs; the function, if any, of extracellular miRNAs in the cervicovaginal tract of healthy  
454 individuals remains to be determined. We observed minimal differences in extracellular miRNA  
455 profiles between SIV-infected and uninfected subjects or, surprisingly, even during the menstrual  
456 cycle, suggesting a certain stability of extracellular miRNA in the compartment. Correlation of  
457 miRNA concentrations in EV-depleted and -replete fractions was also apparent. Based on relative  
458 abundance compared with miRNAs of other cellular/tissue origins (e.g., heart and lung specific miR-  
459 126, kidney-specific miR-196b, and liver-specific miR-192)<sup>59,60</sup>, miRNAs in EVs and exRNPs of CVL  
460 are likely derived from epithelial cells (including goblet cells), and cells of the immune system (as  
461 suggested, e.g., by myeloid-enriched miR-223 and lymphocyte-enriched miR-150)<sup>61</sup>. Of the most  
462 abundant miRNAs we identified, some have been ascribed tumor-suppressive roles in cancers<sup>62-68</sup>.  
463 Also, miR-223 and miR-150 have been described as “anti-HIV” miRNAs<sup>69</sup> among a variety of  
464 reported antiretroviral small RNAs (sRNAs), both host and viral<sup>70-75</sup>. Given their relative abundance  
465 in the vaginal tract, a common site for HIV infection, these miRNAs may contribute to antiviral  
466 defenses.

467 Along these lines, a second major finding of this study is a possible role for miR-186-5p in  
468 antiretroviral defense, bolstered by the observation that exogenous miR-186-5p transfection  
469 efficiency correlates inversely with HIV p24 release. Previous publications have identified protein  
470 constituents in the cervicovaginal lavage with anti-HIV efficacies (for example<sup>7,14,22</sup>). Our  
471 identification of miRNA as a potential anti-HIV agent adds an element of complexity to the picture  
472 of tissue-specific antiretroviral defense. In contrast with an early report of direct binding of host  
473 miRNAs to retroviral transcripts and subsequent suppression<sup>69</sup>, it now appears that this mechanism  
474 of suppression may be relatively uncommon<sup>76</sup>. Anti-HIV miRNAs may be more likely to exert effects  
475 through control of host genes instead (e.g.,<sup>77</sup>). Our data also support the conclusion that reduction of  
476 HIV RNA levels is not the main mechanism for miR-186-mediated suppression of HIV release.

477 How, then, might miR-186-5p, whether endogenous or exogenous (therapeutically introduced)  
478 contribute to antiretroviral effects? Combining several miRNA target prediction, validation, and  
479 enrichment analysis approaches<sup>78-84</sup>, we noticed a few putative miR-186-5p targets and related  
480 pathways that may merit follow-up. One target of miR-186-5p that was validated experimentally by  
481 multiple methods is FOXO1<sup>85</sup>, an important contributor to apoptosis but also immunoregulation via  
482 IFN $\gamma$  pathways. Another prominent validated target, P2X7R<sup>86</sup>, is involved in membrane budding, T-  
483 cell-mediated cytotoxicity, cellular response to extracellular stimuli and T-cell  
484 homeostasis/proliferation. There is also evidence that miR-186-5p targets the HIV co-receptor CXCR4  
485<sup>87</sup>. Pathway enrichment analyses<sup>83,84</sup> suggest that miR-186-5p targets participate significantly in  
486 infection-related networks, including prion diseases, viral carcinogenesis, and responses to measles  
487 and herpes simplex virus infections. Although miRNA target prediction algorithms are imperfect,  
488 and validation efforts are of varying quality<sup>88,89</sup>, these findings may shed some light on how miR-  
489 186-5p is involved in responses to HIV.

490 We would like to emphasize several aspects of the study that open the door to future research:

- 491 1. We used stepped ultracentrifugation without density gradients because of the small sample  
492 volumes available. Although stepped ultracentrifugation remains a widely used method for EV  
493 enrichment <sup>43,90</sup>, subsequent gradients or alternative isolation methods could be attempted with  
494 larger volume samples to increase purity in future. Possibly, our study overestimates the  
495 abundance of miRNAs in CVL EVs, and differential packaging into EVs and exRNPs is masked  
496 by contamination of our EV preps with exRNPs.
- 497 2. Our qPCR array approach and focus on miRNAs leaves room for additional work. While we  
498 are confident that our array captured most of the abundant miRNAs in CVL, sequencing short  
499 and longer RNAs could reveal additional markers.
- 500 3. The small number of subjects and the absence of obvious menstrual cycle in infected subjects  
501 precludes strong conclusions about EV or miRNA associations with either infection or the  
502 menstrual cycle. For example, we did not observe the expected increase in miR-451a or other  
503 red blood cell-specific miRNAs during menstruation. However, since only two animals showed  
504 evidence of cycling, experiments with more subjects and larger sample volumes are needed.
- 505 4. Our previous criticisms of miRNA functional studies <sup>91</sup> also apply to our results here.  
506 Additional work is needed to assess the potential of miR-186-5p to regulate retrovirus  
507 production at endogenous levels, for example by showing that it is present in active RNPs <sup>92</sup>  
508 and that it interacts directly with specific host or viral targets. However, it is also important to  
509 note that miR-186-5p could have therapeutic benefit even if it must be delivered at  
510 supraphysiologic concentrations. Finally, it is possible, but must be demonstrated, that miR-  
511 186-5p acts in a paracrine fashion via EV or exRNP shuttles.
- 512 5. We have investigated the effects of miR-186-5p only in monocyte-derived macrophages. We  
513 chose to begin with this cell type because of the abundance of miR-223 and the known role of  
514 macrophages in the epithelium. Other cell types should also be investigated.
- 515 Overall, the results presented here support further development of CVL and its constituents as a  
516 window into the health of the cervicovaginal compartment in retroviral infection and beyond.  
517 Furthermore, delivery of miR-186-5p could act to suppress retrovirus release.

518

519 **Supplementary Materials:** Figure S1: Specimen Collection and Sample Processing Workflow, Figure S2: miRNA  
520 profile of CVL fractions, Table S1: Recovered volumes: CVL, Table S2: NTA dilution factors, CVL, Table S3:  
521 Pooling Strategy

522 **Author Contributions:** Conceptualization, Zezhou Zhao, Dillon C. Muth, Grace V. Hancock, Kelly A. Metcalf  
523 Pate and Kenneth W. Witwer; Data curation, Zezhou Zhao and Kenneth W. Witwer; Formal analysis, Zezhou  
524 Zhao, Dillon C. Muth and Kenneth W. Witwer; Funding acquisition, Kenneth W. Witwer; Investigation, Zezhou  
525 Zhao, Dillon C. Muth, Kathleen Mulka, Zhaohao Liao and Bonita H. Powell; Methodology, Zezhou Zhao,  
526 Kathleen Mulka, Grace V. Hancock, Kelly A. Metcalf Pate and Kenneth W. Witwer; Project administration,  
527 Kenneth W. Witwer; Resources, Kelly A. Metcalf Pate and Kenneth W. Witwer; Supervision, Zhaohao Liao and  
528 Kenneth W. Witwer; Visualization, Zezhou Zhao, Dillon C. Muth and Kenneth W. Witwer; Writing – original  
529 draft, Kenneth W. Witwer; Writing – review & editing, Zezhou Zhao, Dillon C. Muth and Kenneth W. Witwer.

530 **Funding:** This research was funded by the Johns Hopkins University Center for AIDS Research, an NIH funded  
531 program, grant number P30AI094189 (pilot grant to KWW; ZZ and GVH were Baltimore HIV/AIDS scholars);  
532 by the US National Institutes of Health, DA040385, DA047807, AI144997, and MH118164 (to KWW); by  
533 UG3CA241694, supported by the NIH Common Fund, through the Office of Strategic Coordination/Office of the  
534 NIH Director; and by the National Center for Research Resources and the Office of Research Infrastructure  
535 Programs (ORIP) and the National Institutes of Health, grant number P40 OD013117. DM and KM received  
536 support through NIH grant number T32 OD011089.

537 **Acknowledgments:** The authors thank Robert Adams, Lauren Ostrenga, and Sarah Beck for contributions to  
538 these studies. The authors gratefully acknowledge the Oregon National Primate Research Center and David  
539 Erikson for hormone analyses and endocrinology advice and thank Barbara Smith of the JHU IBBS Microscope  
540 Facility for expert assistance with electron microscopy. Amanda Steele provided paid assistance with editing  
541 and organizing an early version of the manuscript.

542 **Conflicts of Interest:** The authors have no competing interests to declare. The funding organization(s) played  
543 no role in the study design; in the collection, analysis, and interpretation of the data; in the writing of the report;  
544 or in the decision to submit the report for publication.

545



546 **REFERENCES**

- 547 1. Hanson EK, Ballantyne J. Highly specific mRNA biomarkers for the identification of vaginal  
548 secretions in sexual assault investigations. *Sci Justice*. 2013;53(1):14-22.  
549 doi:10.1016/j.scijus.2012.03.007
- 550 2. Jakubowska J, Maclejewska A, Pawłowski R, Bielawski KP. mRNA profiling for vaginal fluid  
551 and menstrual blood identification. *Forensic Sci Int Genet*. 2013;7(2):272-278.  
552 doi:10.1016/j.fsigen.2012.11.005
- 553 3. Park JL, Kwon OH, Kim JH, et al. Identification of body fluid-specific DNA methylation  
554 markers for use in forensic science. *Forensic Sci Int Genet*. 2014;13:147-153.  
555 doi:10.1016/j.fsigen.2014.07.011
- 556 4. Hanson EK, Lubenow H, Ballantyne J. Identification of forensically relevant body fluids using  
557 a panel of differentially expressed microRNAs. *Anal Biochem*. 2009;387(2):303-314.  
558 doi:10.1016/j.ab.2009.01.037S0003-2697(09)00065-7 [pii]
- 559 5. Liu J, Sun H, Wang X, et al. Increased Exosomal MicroRNA-21 and MicroRNA-146a Levels in  
560 the Cervicovaginal Lavage Specimens of Patients with Cervical Cancer. *Int J Mol Sci Int J Mol*  
561 *Sci*. 2014;15:758-773. doi:10.3390/ijms15010758
- 562 6. Van Ostade X, Dom M, Tjalma W, Van Raemdonck G. Candidate biomarkers in the cervical  
563 vaginal fluid for the (self-)diagnosis of cervical precancer. *Arch Gynecol Obstet*. 2018;297(2):295-  
564 311. doi:10.1007/s00404-017-4587-2
- 565 7. Van Raemdonck GAA, Tjalma WAA, Coen EP, Depuydt CE, Van Ostade XWM. Identification  
566 of Protein Biomarkers for Cervical Cancer Using Human Cervicovaginal Fluid. *PLoS One*.  
567 2014;9(9):e106488. doi:10.1371/journal.pone.0106488
- 568 8. Gravett MG, Thomas A, Schneider KA, et al. Proteomic Analysis of Cervical-Vaginal  
569 Fluid: Identification of Novel Biomarkers for Detection of Intra-amniotic Infection. *J Proteome*  
570 *Res*. 2007;6(1):89-96. doi:10.1021/pr060149v
- 571 9. Datcu R, Gesink D, Mulvad G, et al. Bacterial vaginosis diagnosed by analysis of first-void-  
572 urine specimens. *J Clin Microbiol*. 2014;52(1):218-225. doi:10.1128/JCM.02347-13
- 573 10. Srinivasan S, Morgan MT, Fiedler TL, et al. Metabolic signatures of bacterial vaginosis  
574 Supplementary file: Figure S1. *MBio*. 2015;6(2):1-16. doi:10.1128/mBio.00204-15
- 575 11. Zevin AS, Xie IY, Birse K, et al. Microbiome Composition and Function Drives Wound-  
576 Healing Impairment in the Female Genital Tract. *PLoS Pathog*. 2016;12(9):e1005889.  
577 doi:10.1371/journal.ppat.1005889
- 578 12. Boggiano C, Littman DR. HIV's Vagina Travelogue. *Immunity*. 2007;26(2):145-147.  
579 doi:10.1016/j.immuni.2007.02.001

- 580 13. Patel M V., Ghosh M, Fahey J V., Ochsenbauer C, Rossoll RM, Wira CR. Innate Immunity in  
581 the Vagina (Part II): Anti-HIV Activity and Antiviral Content of Human Vaginal Secretions.  
582 *Am J Reprod Immunol.* 2014;72(1):22-33. doi:10.1111/aji.12218
- 583 14. Burgener A, Boutilier J, Wachihi C, et al. Identification of differentially expressed proteins in  
584 the cervical mucosa of HIV-1-resistant sex workers. *J Proteome Res.* 2008;7(10):4446-4454.  
585 doi:10.1021/pr800406r
- 586 15. Benki S, Mostad SB, Richardson BA, Mandaliya K, Kreiss JK, Overbaugh J. Increased levels of  
587 HIV-1-infected cells in endocervical secretions after the luteinizing hormone surge. *J Acquir*  
588 *Immune Defic Syndr.* 2008;47(5):529-534. doi:10.1097/QAI.0b013e318165b952
- 589 16. Zara F, Nappi RE, Brerra R, Migliavacca R, Maserati R, Spinillo A. Markers of local immunity  
590 in cervico-vaginal secretions of HIV infected women: implications for HIV shedding. *Sex*  
591 *Transm Infect.* 2004;80(2):108-112. doi:10.1136/sti.2003.005157
- 592 17. Gardella B, Roccio M, Maccabruni A, et al. HIV shedding in cervico-vaginal secretions in  
593 pregnant women. *Curr HIV Res.* 2011;9(5):313-320. doi:Abs: CHIVR-162 [pii]
- 594 18. Seaton KE, Ballweber L, Lan A, et al. HIV-1 specific IgA detected in vaginal secretions of HIV  
595 uninfected women participating in a microbicide trial in Southern Africa are primarily  
596 directed toward gp120 and gp140 specificities. *PLoS One.* 2014;9(7).  
597 doi:10.1371/journal.pone.0101863
- 598 19. Ghosh M, Fahey J V., Shen Z, et al. Anti-HIV activity in cervical-vaginal secretions from HIV-  
599 Positive and -Negative women correlate with innate antimicrobial levels and IgG antibodies.  
600 *PLoS One.* 2010;5(6). doi:10.1371/journal.pone.0011366
- 601 20. Clemetson DB, Moss GB, Willerford DM, et al. Detection of HIV DNA in cervical and vaginal  
602 secretions. Prevalence and correlates among women in Nairobi, Kenya. *Jama.*  
603 1993;269(22):2860-2864. doi:10.1016/0020-7292(94)90090-6
- 604 21. Burgener A, Rahman S, Ahmad R, et al. Comprehensive proteomic study identifies serpin and  
605 cystatin antiproteases as novel correlates of HIV-1 resistance in the cervicovaginal mucosa of  
606 female sex workers. *J Proteome Res.* 2011;10(11):5139-5149. doi:10.1021/pr200596r
- 607 22. Drannik AG, Nag K, Yao XD, et al. Anti-HIV-1 Activity of Elafin Depends on Its Nuclear  
608 Localization and Altered Innate Immune Activation in Female Genital Epithelial Cells. *PLoS*  
609 *One.* 2012;7(12). doi:10.1371/journal.pone.0052738
- 610 23. Yáñez-Mó M, Siljander PR-M, Andreu Z, et al. Biological properties of extracellular vesicles  
611 and their physiological functions. *J Extracell vesicles.* 2015;4:27066. doi:10.3402/jev.v4.27066
- 612 24. Théry C, Witwer KW, Aikawa E, et al. Minimal information for studies of extracellular vesicles  
613 2018 (MISEV2018): a position statement of the International Society for Extracellular Vesicles  
614 and update of the MISEV2014 guidelines. *J Extracell Vesicles.* 2018;7(1).

- 615           doi:10.1080/20013078.2018.1535750
- 616   25.   Witwer KW, Théry C. Extracellular vesicles or exosomes? On primacy, precision, and  
617       popularity influencing a choice of nomenclature. *J Extracell Vesicles*. 2019;8(1):1648167.  
618       doi:10.1080/20013078.2019.1648167
- 619   26.   Meehan B, Rak J, Di Vizio D. Oncosomes - large and small: what are they, where they came  
620       from? *J Extracell vesicles*. 2016;5:33109.
- 621   27.   György B, Hung ME, Breakefield XO, Leonard JN. Therapeutic applications of extracellular  
622       vesicles: clinical promise and open questions. *Annu Rev Pharmacol Toxicol*. 2015;55:439-464.  
623       doi:10.1146/annurev-pharmtox-010814-124630
- 624   28.   Witwer KW, Buzás EI, Bemis LT, et al. Standardization of sample collection, isolation and  
625       analysis methods in extracellular vesicle research. *J Extracell vesicles*. 2013;2:1-25.  
626       doi:10.3402/jev.v2i0.20360
- 627   29.   Smith JA, Daniel R. Human vaginal fluid contains exosomes that have an inhibitory effect on  
628       an early step of the HIV-1 life cycle. *AIDS*. August 2016. doi:10.1097/QAD.0000000000001236
- 629   30.   Muth DC, McAlexander MA, Ostrenga LJ, et al. Potential role of cervicovaginal extracellular  
630       particles in diagnosis of endometriosis. *Bmc Vet Res*. 2015. doi:10.1186/s12917-015-0513-7
- 631   31.   Sergeeva AM, Pinzon Restrepo N, Seitz H. Quantitative aspects of RNA silencing in  
632       metazoans. *Biochem*. 2013;78(6):613-626. doi:10.1134/S0006297913060072BCM78060795 [pii]
- 633   32.   Bartel DP. MicroRNAs: target recognition and regulatory functions. *Cell*. 2009;136(2):215-233.  
634       doi:S0092-8674(09)00008-7 [pii]10.1016/j.cell.2009.01.002
- 635   33.   Valadi H, Ekström K, Bossios A, Sjöstrand M, Lee JJ, Lötvall JO. Exosome-mediated transfer  
636       of mRNAs and microRNAs is a novel mechanism of genetic exchange between cells. *Nat Cell*  
637       *Biol*. 2007;9(6):654-659. doi:10.1038/ncb1596
- 638   34.   Aliotta JM, Sanchez-Guijo FM, Dooner GJ, et al. Alteration of marrow cell gene expression,  
639       protein production, and engraftment into lung by lung-derived microvesicles: a novel  
640       mechanism for phenotype modulation. *Stem Cells*. 2007;25(9):2245-2256.  
641       doi:10.1634/stemcells.2007-0128
- 642   35.   Baj-Krzyworzeka M, Szatanek R, Węglarczyk K, et al. Tumour-derived microvesicles carry  
643       several surface determinants and mRNA of tumour cells and transfer some of these  
644       determinants to monocytes. *Cancer Immunol Immunother*. 2006;55(7):808-818.  
645       doi:10.1007/s00262-005-0075-9
- 646   36.   Mateescu B, Kowal EJK, van Balkom BWM, et al. Obstacles and opportunities in the functional  
647       analysis of extracellular vesicle RNA - an ISEV position paper. *J Extracell vesicles*.  
648       2017;6(1):1286095. doi:10.1080/20013078.2017.1286095

- 649 37. Turchinovich A, Weiz L, Langheinze A, Burwinkel B. Characterization of extracellular  
650 circulating microRNA. *Nucleic Acids Res.* 2011;39(16):7223-7233. doi:gkr254  
651 [pii]10.1093/nar/gkr254
- 652 38. Arroyo JD, Chevillet JR, Kroh EM, et al. Argonaute2 complexes carry a population of  
653 circulating microRNAs independent of vesicles in human plasma. *Proc Natl Acad Sci U S A.*  
654 2011;108(12):5003-5008. doi:1019055108 [pii]10.1073/pnas.1019055108
- 655 39. Witwer KW, Sarbanes SL, Liu J, Clements JE. A plasma microRNA signature of acute lentiviral  
656 infection: biomarkers of CNS disease. *AIDS.* 2011;204(7):1104-1114.  
657 doi:10.1097/QAD.0b013e32834b95bf
- 658 40. Zubakov D, Boersma AW, Choi Y, van Kuijk PF, Wiemer EA, Kayser M. MicroRNA markers  
659 for forensic body fluid identification obtained from microarray screening and quantitative RT-  
660 PCR confirmation. *Int J Leg Med.* 2010;124(3):217-226. doi:10.1007/s00414-009-0402-3
- 661 41. Seashols-Williams S, Lewis C, Calloway C, et al. High-throughput miRNA sequencing and  
662 identification of biomarkers for forensically relevant biological fluids. *Electrophoresis.* August  
663 2016. doi:10.1002/elps.201600258
- 664 42. Rahman S, Rabbani R, Wachihi C, et al. Mucosal serpin A1 and A3 levels in HIV highly  
665 exposed sero-negative women are affected by the menstrual cycle and hormonal  
666 contraceptives but are independent of epidemiological confounders. *Am J Reprod Immunol.*  
667 2013;69(1):64-72. doi:10.1111/aji.12014
- 668 43. They C, Amigorena S, Raposo G, Clayton A. Isolation and characterization of exosomes from  
669 cell culture supernatants and biological fluids. *Curr Protoc Cell Biol.* 2006;Chapter 3:Unit 3 22.  
670 doi:10.1002/0471143030.cb0322s30
- 671 44. McAlexander MA, Phillips MJ, Witwer KW. Comparison of methods for miRNA extraction  
672 from plasma and quantitative recovery of RNA from cerebrospinal fluid. *Front Genet.*  
673 2013;4(MAY):83. doi:10.3389/fgene.2013.00083
- 674 45. Chen C, Ridzon DA, Broomer AJ, et al. Real-time quantification of microRNAs by stem-loop  
675 RT-PCR. *Nucleic Acids Res.* 2005;33(20):e179. doi:33/20/e179 [pii]10.1093/nar/gni178
- 676 46. Witwer KW, Sarbanes SL, Liu J, Clements JE. A plasma microRNA signature of acute lentiviral  
677 infection: biomarkers of central nervous system disease. *AIDS.* 2011;25(17):2057-2067.  
678 doi:10.1097/QAD.0b013e32834b95bf
- 679 47. Clough E, Barrett T. The Gene Expression Omnibus Database. *Methods Mol Biol.* 2016;1418:93-  
680 110. doi:10.1007/978-1-4939-3578-9\_5
- 681 48. Van Deun J, Mestdagh P, Agostinis P, et al. EV-TRACK: transparent reporting and  
682 centralizing knowledge in extracellular vesicle research. *Nat Methods.* 2017;14(3):228-232.  
683 doi:10.1038/nmeth.4185



- 684 49. Biton M, Levin A, Slyper M, et al. Epithelial microRNAs regulate gut mucosal immunity via  
685 epithelium–T cell crosstalk. *Nat Immunol.* 2011;12(3):239-246. doi:10.1038/ni.1994
- 686 50. Jurcevic S, Olsson B, Klinga-Levan K. MicroRNA expression in human endometrial  
687 adenocarcinoma. *Cancer Cell Int.* 2014;14(1):1-8. doi:10.1186/s12935-014-0088-6
- 688 51. Jayaraman M, Radhakrishnan R, Mathews CA, et al. Identification of novel diagnostic and  
689 prognostic miRNA signatures in endometrial cancer. *Genes Cancer.* 2017;8(5-6):566-576.  
690 doi:10.18632/genesandcancer.144
- 691 52. Cosar E, Mamillapalli R, Ersoy GS, Cho SY, Seifer B, Taylor HS. Serum microRNAs as  
692 diagnostic markers of endometriosis: a comprehensive array-based analysis. *Fertil Steril.*  
693 2016;106(2):402-409. doi:10.1016/j.fertnstert.2016.04.013
- 694 53. Schwarzenbach H, da Silva AM, Calin G, Pantel K. Data Normalization Strategies for  
695 MicroRNA Quantification. *Clin Chem.* 2015;61(11):1333-1342.  
696 doi:10.1373/clinchem.2015.239459
- 697 54. Nguyen HPT, Simpson RJ, Salamonsen LA, Greening DW. Extracellular Vesicles in the  
698 Intrauterine Environment: Challenges and Potential Functions. *Biol Reprod.* 2016;95(5):109-  
699 109. doi:10.1095/biolreprod.116.143503
- 700 55. Campoy I, Lanau L, Altadill T, et al. Exosome-like vesicles in uterine aspirates: a comparison  
701 of ultracentrifugation-based isolation protocols. *J Transl Med.* 2016;14(1):180.  
702 doi:10.1186/s12967-016-0935-4
- 703 56. Zegels G, Aa G, Raemdonck V, et al. Comprehensive proteomic analysis of human cervical-  
704 vaginal fluid using colposcopy samples. *Proteome Sci.* 2009;7(7). doi:10.1186/1477-5956-7-17
- 705 57. Gravett MG, Thomas A, Schneider KA, et al. PROTEOMIC ANALYSIS OF CERVICAL-  
706 VAGINAL FLUID: IDENTIFICATION OF NOVEL BIOMARKERS FOR DETECTION OF  
707 INTRA-AMNIOTIC INFECTION. doi:10.1021/pr060149v
- 708 58. Arroyo JD, Chevillet JR, Kroh EM, et al. Argonaute2 complexes carry a population of  
709 circulating microRNAs independent of vesicles in human plasma. *Proc Natl Acad Sci U S A.*  
710 2011;108(12):5003-5008. doi:10.1073/pnas.1019055108
- 711 59. Guo Z, Maki M, Ding R, Yang Y, Zhang B, Xiong L. Genome-wide survey of tissue-specific  
712 microRNA and transcription factor regulatory networks in 12 tissues. *Sci Rep.* 2014;4:1-9.  
713 doi:10.1038/srep05150
- 714 60. Panwar B, Omenn GS, Guan Y. miRmine: A Database of Human miRNA Expression Profiles.  
715 *Bioinformatics.* 2017;33(10):btx019. doi:10.1093/bioinformatics/btx019
- 716 61. Pritchard CC, Kroh E, Wood B, et al. Blood cell origin of circulating microRNAs: a cautionary  
717 note for cancer biomarker studies. *Cancer Prev Res.* 2012;5(3):492-497. doi:1940-6207.CAPR-11-  
718 0370 [pii]10.1158/1940-6207.CAPR-11-0370

- 719 62. Luo P, Wang Q, Ye Y, et al. MiR-223-3p functions as a tumor suppressor in lung squamous  
720 cell carcinoma by miR-223-3p-mutant p53 regulatory feedback loop. *J Exp Clin Cancer Res.*  
721 2019;38(1). doi:10.1186/s13046-019-1079-1
- 722 63. Ji Q, Xu X, Song Q, et al. miR-223-3p Inhibits Human Osteosarcoma Metastasis and  
723 Progression by Directly Targeting CDH6. *Mol Ther.* 2018;26:1299-1312.  
724 doi:10.1016/j.ymthe.2018.03.009
- 725 64. Lawrence M JY. miR-203 Functions as a Tumor Suppressor by Inhibiting Epithelial to  
726 Mesenchymal Transition in Ovarian Cancer. *J Cancer Sci Ther.* 2015;07(02). doi:10.4172/1948-  
727 5956.1000322
- 728 65. Deng B, Wang B, Fang J, et al. MiRNA-203 suppresses cell proliferation, migration and  
729 invasion in colorectal cancer via targeting of EIF5A2. *Sci Rep.* 2016;6. doi:10.1038/srep28301
- 730 66. Wang S, Zhang R, Claret FX, Yang H. Involvement of microRNA-24 and DNA methylation in  
731 resistance of nasopharyngeal carcinoma to ionizing radiation. *Mol Cancer Ther.*  
732 2014;13(12):3163-3174. doi:10.1158/1535-7163.MCT-14-0317
- 733 67. Fang ZH, Wang SL, Zhao JT, et al. MIR-150 exerts antileukemia activity in vitro and in vivo  
734 through regulating genes in multiple pathways. *Cell Death Dis.* 2016;7(9).  
735 doi:10.1038/cddis.2016.256
- 736 68. Ito M, Teshima K, Ikeda S, et al. MicroRNA-150 inhibits tumor invasion and metastasis by  
737 targeting the chemokine receptor CCR6, in advanced cutaneous T-cell lymphoma. *Blood.*  
738 2014;123(10):1499-1511. doi:10.1182/blood-2013-09-527739
- 739 69. Huang J, Wang F, Argyris E, et al. Cellular microRNAs contribute to HIV-1 latency in resting  
740 primary CD4+ T lymphocytes. *Nat Med.* 2007;13(10):1241-1247. doi:nm1639  
741 [pii]10.1038/nm1639
- 742 70. Swaminathan S, Murray DD, Kelleher AD. miRNAs and HIV: unforeseen determinants of  
743 host-pathogen interaction. *Immunol Rev.* 2013;254(1):265-280. doi:10.1111/imr.12077
- 744 71. Sisk JM, Witwer KW, Tarwater PM, Clements JE. SIV replication is directly downregulated by  
745 four antiviral miRNAs. *Retrovirology.* 2013;10(1):95. doi:1742-4690-10-95 [pii]10.1186/1742-  
746 4690-10-95
- 747 72. Wang X, Ye L, Zhou Y, Liu MQ, Zhou DJ, Ho WZ. Inhibition of anti-HIV microRNA  
748 expression: a mechanism for opioid-mediated enhancement of HIV infection of monocytes.  
749 *Am J Pathol.* 2011;178(1):41-47. doi:S0002-9440(10)00089-1 [pii]10.1016/j.ajpath.2010.11.042
- 750 73. Swaminathan S, Suzuki K, Seddiki N, et al. Differential regulation of the Let-7 family of  
751 microRNAs in CD4+ T cells alters IL-10 expression. *J Immunol.* 2012;188(12):6238-6246.  
752 doi:jimmunol.1101196 [pii]10.4049/jimmunol.1101196
- 753 74. Klase Z, Kale P, Winograd R, et al. HIV-1 TAR element is processed by Dicer to yield a viral

- 754 micro-RNA involved in chromatin remodeling of the viral LTR. *BMC Mol Biol.* 2007;8:63.  
755 doi:1471-2199-8-63 [pii]10.1186/1471-2199-8-63
- 756 75. Wagschal A, Rousset E, Basavarajaiah P, et al. Microprocessor, Setx, Xrn2, and Rrp6 co-operate  
757 to induce premature termination of transcription by RNAPII. *Cell.* 2012;150(6):1147-1157.  
758 doi:10.1016/j.cell.2012.08.004S0092-8674(12)00999-3 [pii]
- 759 76. Whisnant AW, Bogerd HP, Flores O, et al. In-Depth Analysis of the Interaction of HIV-1 with  
760 Cellular microRNA Biogenesis and Effector Mechanisms. *MBio.* 2013;4(2).  
761 doi:10.1128/mBio.00193-13e00193-13 [pii]mBio.00193-13 [pii]
- 762 77. Sung TL, Rice AP. miR-198 inhibits HIV-1 gene expression and replication in monocytes and  
763 its mechanism of action appears to involve repression of cyclin T1. *PLoS Pathog.*  
764 2009;5(1):e1000263. doi:10.1371/journal.ppat.1000263
- 765 78. Hsu SD, Tseng YT, Shrestha S, et al. miRTarBase update 2014: an information resource for  
766 experimentally validated miRNA-target interactions. *Nucleic Acids Res.* 2014;42(Database  
767 issue):D78-85. doi:10.1093/nar/gkt1266
- 768 79. Hsu SD, Lin FM, Wu WY, et al. miRTarBase: a database curates experimentally validated  
769 microRNA-target interactions. *Nucleic Acids Res.* 2011;39(Database issue):D163-9.  
770 doi:10.1093/nar/gkq1107
- 771 80. Vergoulis T, Vlachos IS, Alexiou P, et al. TarBase 6.0: capturing the exponential growth of  
772 miRNA targets with experimental support. *Nucleic Acids Res.* 2011. doi:gkr1161  
773 [pii]10.1093/nar/gkr1161
- 774 81. Vlachos IS, Paraskevopoulou MD, Karagkouni D, et al. DIANA-TarBase v7.0: indexing more  
775 than half a million experimentally supported miRNA:mRNA interactions. *Nucleic Acids Res.*  
776 2015;43(Database issue):D153-9. doi:10.1093/nar/gku1215
- 777 82. Lagana A, Forte S, Giudice A, et al. miRo: a miRNA knowledge base. *Database.*  
778 2009;2009(0):bap008-bap008. doi:10.1093/database/bap008
- 779 83. Papadopoulos GL, Alexiou P, Maragkakis M, Reczko M, Hatzigeorgiou AG. DIANA-mirPath:  
780 Integrating human and mouse microRNAs in pathways. *Bioinformatics.* 2009;25(15):1991-1993.  
781 doi:10.1093/bioinformatics/btp299
- 782 84. Vlachos IS, Zagganas K, Paraskevopoulou MD, et al. DIANA-miRPath v3.0: deciphering  
783 microRNA function with experimental support. *Nucleic Acids Res.* 2015;43(W1):W460-W466.  
784 doi:10.1093/nar/gkv403
- 785 85. Myatt SS, Wang J, Monteiro LJ, et al. Definition of microRNAs that repress expression of the  
786 tumor suppressor gene FOXO1 in endometrial cancer. *Cancer Res.* 2010;70(1):367-377.  
787 doi:10.1158/0008-5472.CAN-09-1891
- 788 86. Zhou L, Qi X, Potashkin JA, Abdul-Karim FW, Gorodeski GI. MicroRNAs miR-186 and miR-

- 789 150 down-regulate expression of the pro-apoptotic purinergic P2X7 receptor by activation of  
790 instability sites at the 3'-untranslated region of the gene that decrease steady-state levels of  
791 the transcript. *J Biol Chem*. 2008;283(42):28274-28286. doi:10.1074/jbc.M802663200
- 792 87. Niinuma T, Kai M, Kitajima H, et al. Downregulation of miR-186 is associated with metastatic  
793 recurrence of gastrointestinal stromal tumors. *Oncol Lett*. 2017;14(5):5703-5710.  
794 doi:10.3892/ol.2017.6911
- 795 88. Paraskevopoulou MD, Vlachos IS, Hatzigeorgiou AG. DIANA-TarBase and DIANA Suite  
796 Tools: Studying Experimentally Supported microRNA Targets. *Curr Protoc Bioinforma*.  
797 2016;55(1):12.14.1-12.14.18. doi:10.1002/cpbi.12
- 798 89. Ji Diana Lee Y, Kim V, Muth DC, Witwer KW. Validated MicroRNA Target Databases: An  
799 Evaluation. *Drug Dev Res*. 2015;76(7):389-396. doi:10.1002/ddr.21278
- 800 90. Gardiner C, Vizio D Di, Sahoo S, et al. Techniques used for the isolation and characterization  
801 of extracellular vesicles: results of a worldwide survey. *J Extracell Vesicles*. 2016;5(0).  
802 doi:10.3402/jev.v5.32945
- 803 91. Witwer KW, Halushka MK. Towards the Promise of microRNAs - Enhancing reproducibility  
804 and rigor in microRNA research. *RNA Biol*. September 2016:0.  
805 doi:10.1080/15476286.2016.1236172
- 806 92. La Rocca G, Olejniczak SH, Gonzalez AJ, et al. In vivo, Argonaute-bound microRNAs exist  
807 predominantly in a reservoir of low molecular weight complexes not associated with mRNA.  
808 *Proc Natl Acad Sci U S A*. 2015;112(3):767-772. doi:10.1073/pnas.1424217112
- 809

810 SUPPLEMENTAL MATERIALS

811 Supplemental Figure S1. Collection Materials and Workflow

**A**

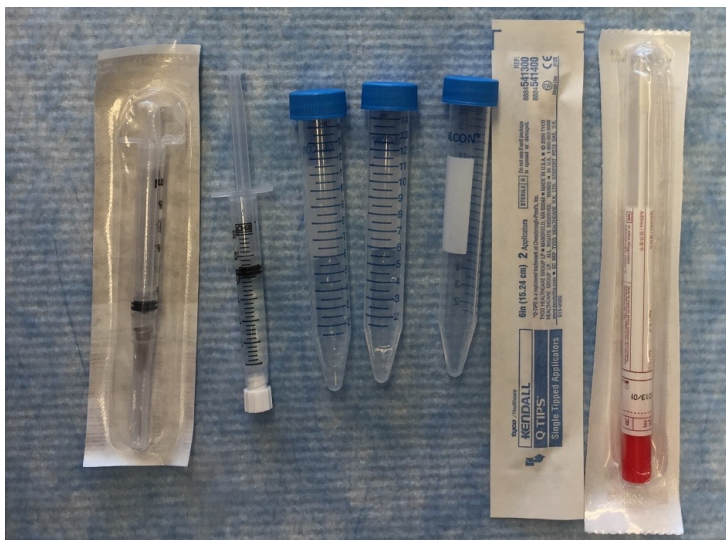

**B**

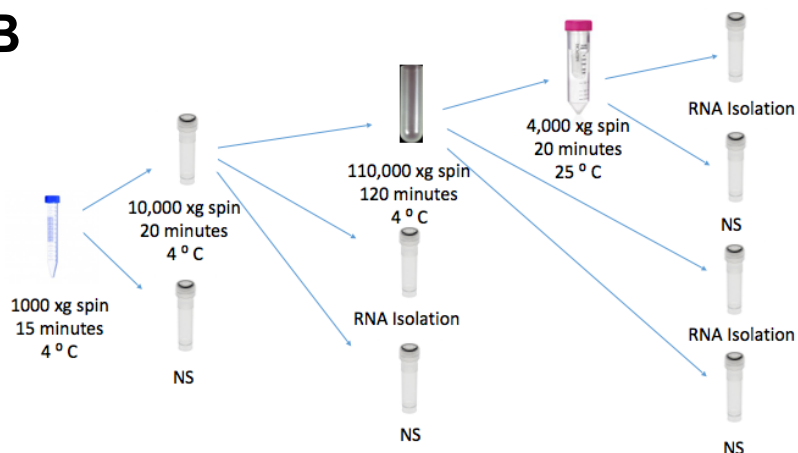

**C**

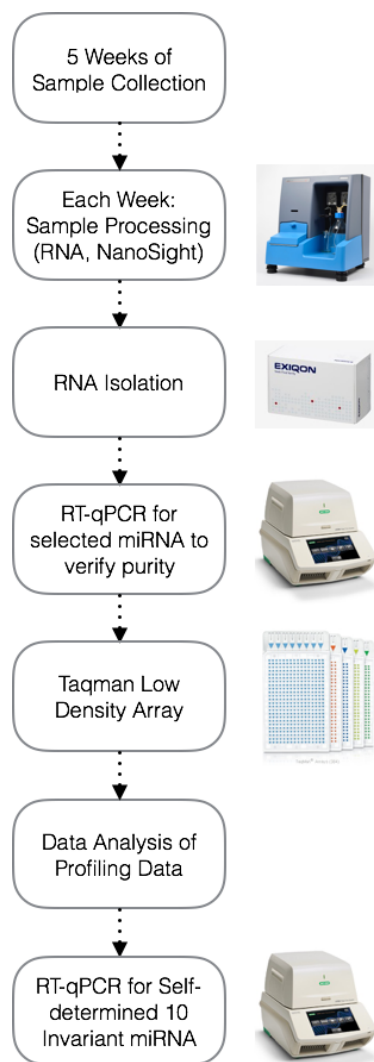

812



813 Supplemental Figure S2

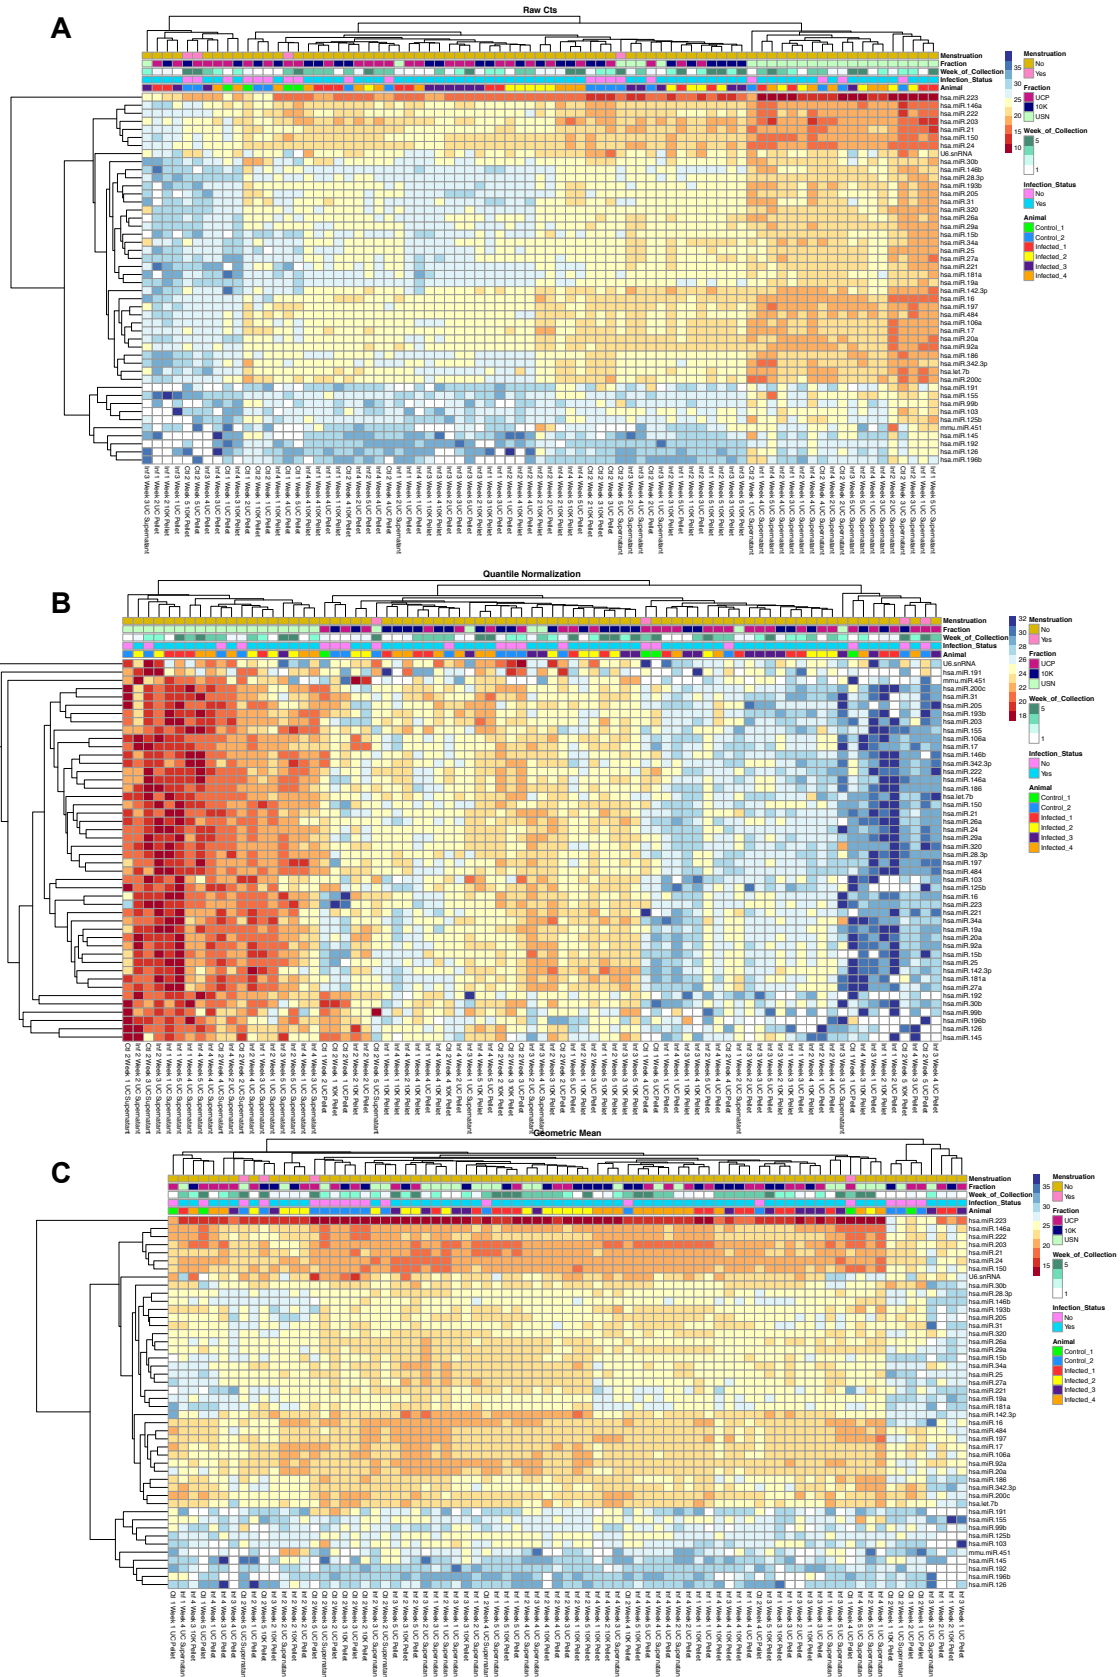

814

815

816 **SUPPLEMENTAL TABLES**

817 **Supplemental Table 1. Recovered volumes: CVL**

| <b>Subject</b>    | <b>Week 1</b> | <b>Week 2</b> | <b>Week 3</b> | <b>Week 4</b> | <b>Week 5</b> |
|-------------------|---------------|---------------|---------------|---------------|---------------|
| <b>Control 1</b>  | 1 mL          | 2 mL          | 1 mL          | 1 mL          | 1 mL          |
| <b>Control 2</b>  | 3 mL          | 0.7 mL        | 2 mL          | 0.5 mL        | 1.25 mL       |
| <b>Infected 1</b> | 1 mL          | 0.2 mL        | 0.5 mL        | 0.3 mL        | 1.5 mL        |
| <b>Infected 2</b> | 1.5 mL        | 1.5 mL        | 2 mL          | 0.8 mL        | 1.75 mL       |
| <b>Infected 3</b> | 0.5 mL        | 0.6 mL        | 2.8 mL        | 0.8 mL        | 2 mL          |
| <b>Infected 4</b> | 0.8 mL        | 0.3 mL        | 0.6 mL        | 0.3 mL        | 1.5 mL        |

818

819

820 **Supplemental Table 2. NTA dilution factors, CVL**

|                      | Time point | Subject   |           |            |            |            |            |
|----------------------|------------|-----------|-----------|------------|------------|------------|------------|
|                      |            | Control 1 | Control 2 | Infected 1 | Infected 2 | Infected 3 | Infected 4 |
| CVL (UC Supernatant) | Week 1     | 1:25      | 1:50      | 1:25       | 1:25       | 1:25       | 1:25       |
|                      | Week 2     | 1:100     | 1:5       | 1:25       | 1:10       | 1:5        | 1:5        |
|                      | Week 3     | 1:10      | 1:5       | 1:5        | 1:5        | 1:10       | 1:10       |
|                      | Week 4     | 1:10      | 1:5       | 1:10       | 1:5        | 1:10       | 1:10       |
|                      | Week 5     | 1:5       | 1:10      | 1:10       | 1:10       | 1:5        | 1:5        |
| CVL (UC Pellet)      | Week 1     | Neat      | 1:5       | 1:5        | 1:5        | 1:5        | 1:5        |
|                      | Week 2     | 1:10      | 1:10      | 1:5        | 1:5        | 1:5        | 1:5        |
|                      | Week 3     | 1:5       | 1:5       | 1:5        | 1:5        | 1:5        | 1:5        |
|                      | Week 4     | 1:5       | 1:5       | 1:5        | 1:5        | 1:5        | 1:5        |
|                      | Week 5     | 1:5       | 1:5       | 1:5        | 1:5        | 1:5        | 1:5        |

Abbreviations: CVL = cervicovaginal lavage; UC = ultracentrifugation

821

822 **Supplemental Table 3. Pooling strategy: Western blot**

823

|                                      |                                                                                                                  |
|--------------------------------------|------------------------------------------------------------------------------------------------------------------|
| <b>Pool 1 (healthy and infected)</b> | Healthy 2 Week 5, Infected 1 Week 2, Infected 3 Week 2, Infected 3 Week 5, Infected 2 Week 3, Infected 2 Week 4  |
| <b>Pool 2 (all healthy)</b>          | Healthy 1 Week 4, Healthy 1 Week 5, Healthy 2 Week 2, Healthy 2 Week 3, Healthy 2 Week 4, Healthy 1 Week 2       |
| <b>Pool 3 (all infected)</b>         | Infected 5 Week 2, Infected 3 Week 3, Infected 2 Week 4, Infected 4 Week 5, Infected 4 Week 3, Infected 1 Week 5 |

824
